# Supplementary material
Source: Springer Nature journal article supplement (https://www.springermedizin.de/resource/supplementary/13063_2009_367_MOESM3_ESM.pdf/9618076)
Supplement: MOESM3 [file 9618076]

# Study of IVF Treatments for Women where Previous IVF has not been Successful

---

## We invite you to take part in a research study.

---

- Before you decide whether to take part, it is important for you to understand why the research is being done and what it will involve.
- Please take time to read the following information carefully. Discuss it with friends and relatives if you wish.
- You are free to decide whether or not to take part in this trial. If you choose not to take part, this will not affect the care you get from your own doctors.
- Ask us if there is anything that is not clear or if you would like more information.

---

## Important things that you need to know

---

- We want to find the best way to treat women who have not responded well to previous IVF.
- We are testing the use of two different medicines as part of IVF treatment, which are Nafarelin and Cetrorelix.
- Nafarelin can be used in two different ways, so the study has three different groups or treatment options.
- One medicine used in the study can cause side-effects, but they are short lived.
- This study fits into your normal treatment, so there are no extra clinic visits or scans.
- You do not have to pay for Nafarelin or Cetrorelix, but the other medicines used in IVF may have to be paid for.
- You can stop taking part in the study at any time.

---

## Contents

---

- 1 Why are we doing this study?
- 2 What do I need to know about the medicines used in this study?
- 3 Why am I being asked to take part?
- 4 What will I need to do if I take part?
- 5 Possible side effects
- 6 More information about taking part
- 7 How to contact us

---

## How to contact us

---

If you have any questions about this study, please talk to the doctors who organise it: Dr Stoke or Mr Prestwich on **01234 149 688**.
